# Supplementary material
Source: publisher figshare collection journal article supplement (https://karger.figshare.com/articles/dataset/_/14134295)
Supplement: Supplementary file 1 [file 1]

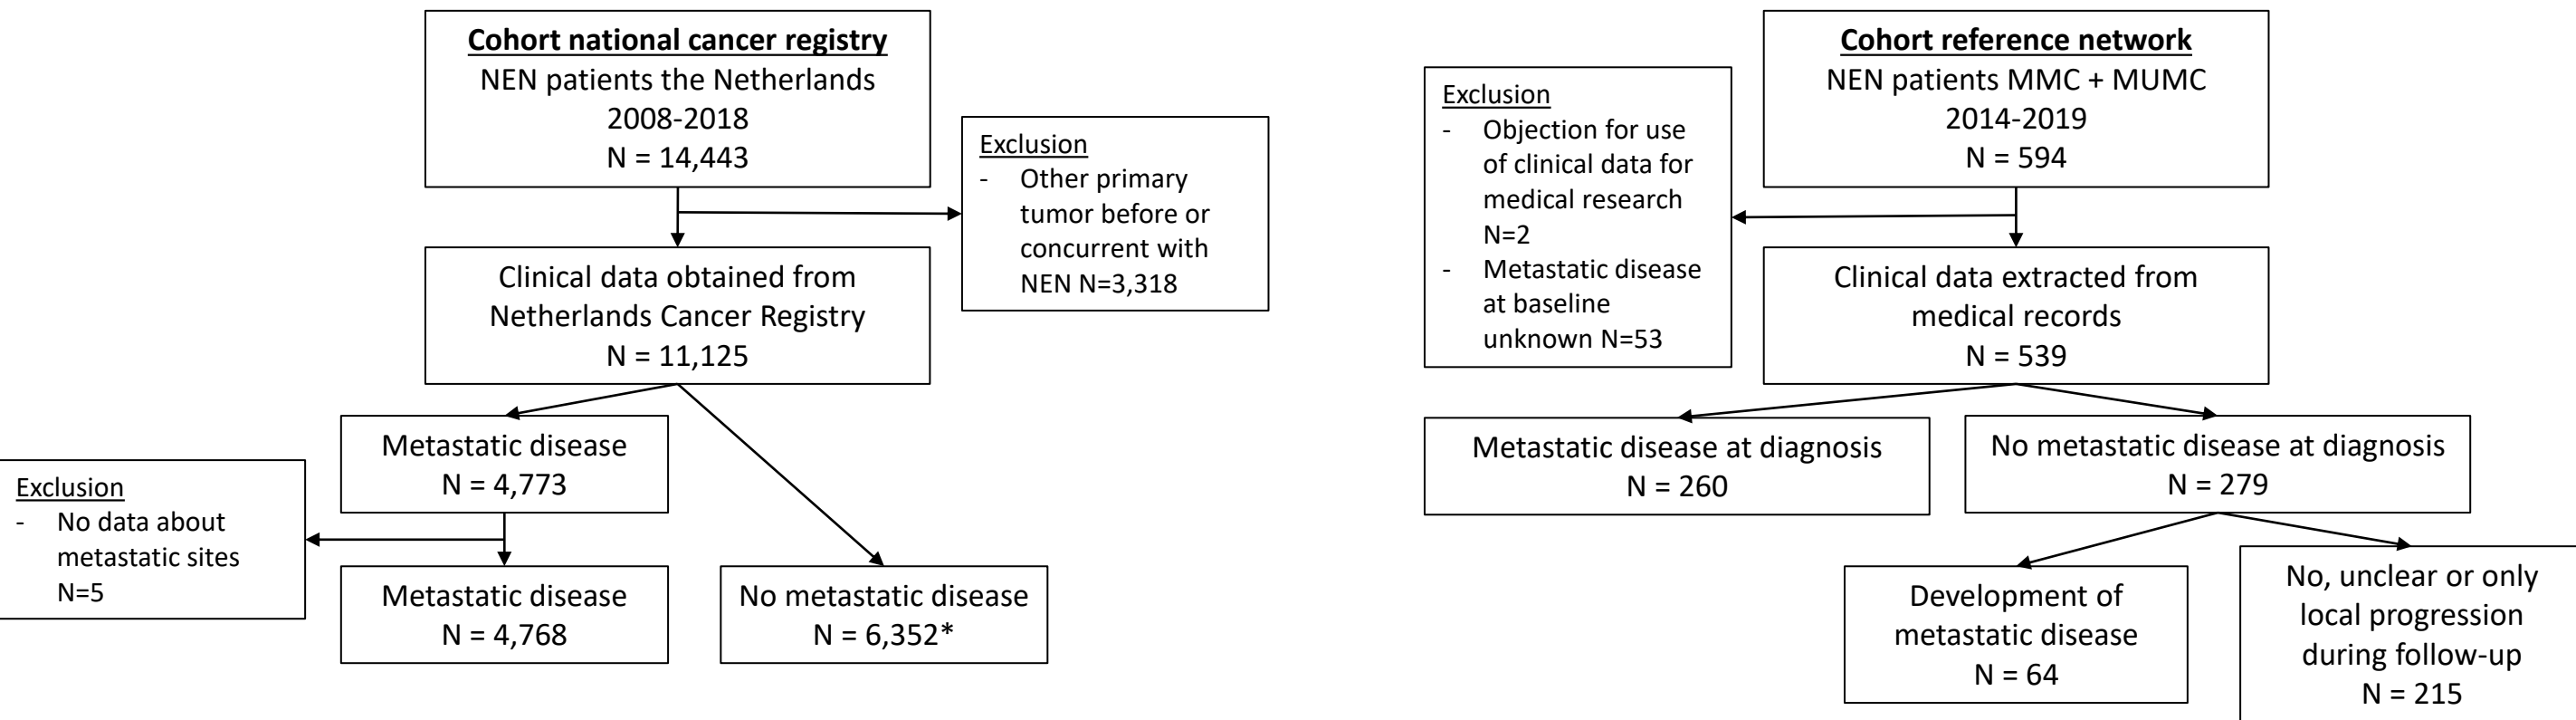

**Supplemental figure 1: Flowchart of patient inclusion in the two cohorts.**

*\*All patients without clear metastatic disease are registered as ‘no metastatic disease’ by the Netherlands Cancer Registry.*

*Abbreviations: NEN = neuroendocrine neoplasm; MMC = Maxima Medical Centre; MUMC = Maastricht University Medical Centre.*
